# Supplementary material for: Strategies to balance covalent and non-covalent biomolecule attachment within collagen-GAG biomaterials
Source: Royal Society of Chemistry journal article supplement (doi:10.1039/c4bm00193a), 2014-01-01
Supplement: c4bm00193a1.pdf [file c4bm00193a1.pdf]

## Supporting Information

### Strategies to balance covalent and non-covalent biomolecule attachment within collagen-GAG biomaterials

Jacquelyn C. Pence, Emily A. Gonnerman, Ryan C. Bailey, Brendan A.C. Harley

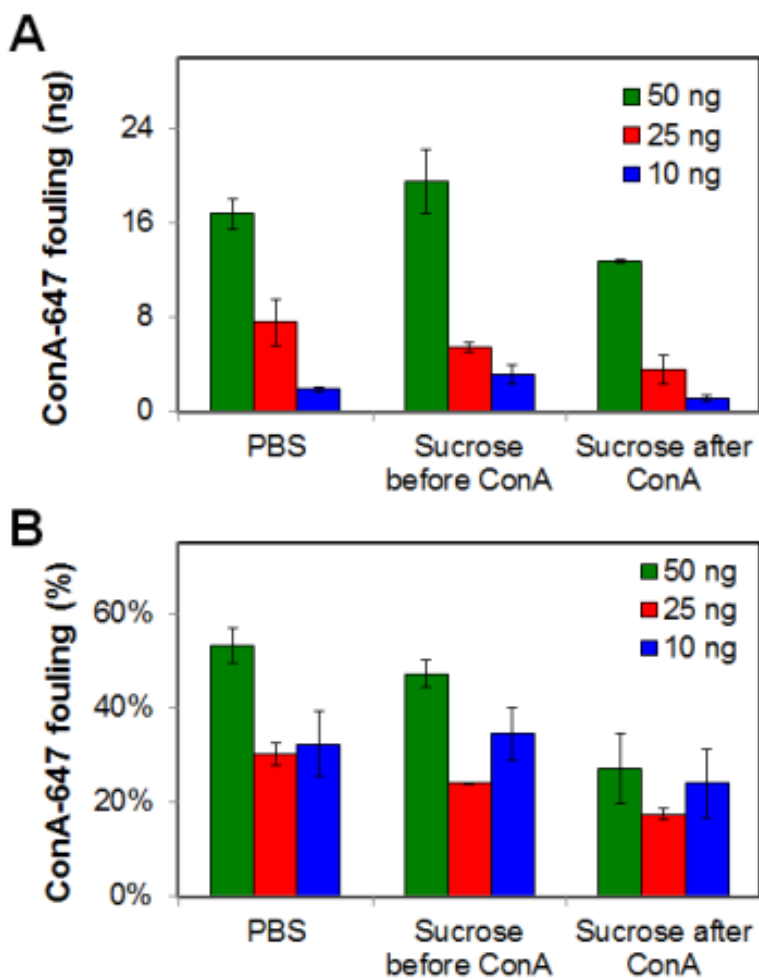

**Supplementary Figure 1.** (A) Concanavalin A (ConA) fouling within scaffold as a function of Con A loading (ng) and wash conditions (5minute ConA exposure). (B) Fraction of ConA fouling within the scaffold as a function of ConA loading (ng) and order of sucrose wash steps (none; before ConA exposure; after ConA exposure).
